# Supplementary material
Source: PubMed Central journal article supplement (PMC3209058)
Supplement: supp_10.11.1413_FigS1.pdf [file supp_10.11.1413_FigS1.pdf]

**Figure S1.**

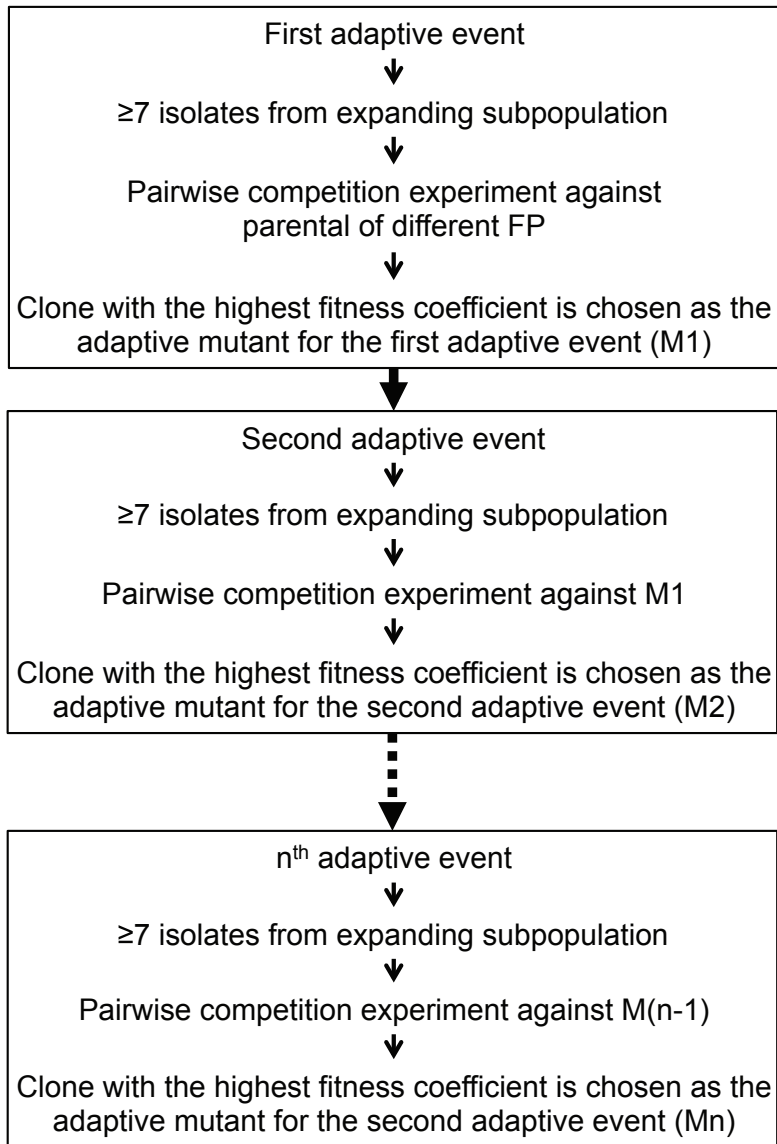

**Figure S1.** Process for identifying adaptive mutants. The pairwise competition experiments were performed in chemostats in the presence of the same concentration of fluconazole used during the evolution of these isolates.
